# Supplementary material for: A Co(ii) framework derived from a tris(4-(triazol-1-yl)phenyl)amine redox-active linker: an electrochemical and magnetic study
Source: Royal Society of Chemistry journal article supplement (doi:10.1039/c8dt01658e), 2018-01-01
Supplement: c8dt01658e1.pdf [file c8dt01658e1.pdf]

## Supporting Information

### **A Co(II) Framework derived from a tris(4-(triazol-1-yl)phenyl)amine Redox-Active linker: electrochemical and magnetic study**

**Chin-May Ngue,<sup>a,b,c</sup> Ching-Wen Chiu,<sup>b</sup> Gene-Hsiang Lee,<sup>b</sup> Shie-Ming Peng,<sup>a,b</sup> Man-Kit Leung,<sup>\*b</sup>  
Chen-I Yang,<sup>\*e</sup> Yen-Hsiang Liu,<sup>\*d</sup> Kuang-Lieh Lu<sup>\*a</sup>**

<sup>a</sup>Institute of Chemistry, Academia Sinica, Taipei 115, Taiwan

<sup>b</sup>Department of Chemistry, National Taiwan University, Taipei 107, Taiwan

<sup>c</sup>Nano Science and Technology Program, Taiwan International Graduate Program, Institute of Physics, Academia Sinica and National Taiwan University

<sup>d</sup>Department of Chemistry, Fu Jen Catholic University, New Taipei City 242, Taiwan

<sup>e</sup>Department of Chemistry, Tunghai University, Taichung 407, Taiwan

## Crystallographic Measurements

A block shaped, red coloured crystal of **1** suitable for crystallographic measurement was mounted on the tip of a glass fiber with dimensions of 0.169 x 0.151 x 0.137 mm<sup>3</sup> and placed on the goniometer head for indexing and intensity data collection using a Nonius Kappa CCD diffractometer equipped with graphite-monochromatized Mo-K $\alpha$  radiation ( $\lambda = 0.71073 \text{ \AA}$ ). Intensity data were collected at 150 K. Data reduction included correction for absorption corrections by the MULTISCAN method using Bruker *SAINT*<sup>1</sup> and *SADABS*.<sup>2</sup> The structure was solved by direct methods and refined against  $F^2$  by the full-matrix least-squares technique using the SHELX-97 software packages.<sup>3</sup> All non-hydrogen atoms were refined anisotropically. The C-bound H atoms were placed in the calculated positions and refined by the riding-model approximation. Further details of the crystallographic data are shown in Table S1.

### References

1. *SAINT*, Bruker (2003), Bruker AXS Inc., Madison Wisconsin, USA.
2. *SADABS*, Bruker (2002), Bruker AXS Inc., Madison Wisconsin, USA.
3. G. M. Sheldrick, *Acta Crystallogr., Sect. A: Found. Crystallogr.*, 2008, **64**, 112.

**Table S1.** Crystal data and structure refinement for compound **1**.

|                                                                                                                                                                                                                                                                                                                                    |                                                                                                |
|------------------------------------------------------------------------------------------------------------------------------------------------------------------------------------------------------------------------------------------------------------------------------------------------------------------------------------|------------------------------------------------------------------------------------------------|
| Empirical formula                                                                                                                                                                                                                                                                                                                  | C <sub>51</sub> H <sub>41</sub> CO <sub>2</sub> N <sub>15</sub> O <sub>11</sub> S <sub>4</sub> |
| <i>F</i> <sub>w</sub>                                                                                                                                                                                                                                                                                                              | 1286.09                                                                                        |
| Temperature, K                                                                                                                                                                                                                                                                                                                     | 150(2)                                                                                         |
| Crystal system                                                                                                                                                                                                                                                                                                                     | monoclinic                                                                                     |
| Space group                                                                                                                                                                                                                                                                                                                        | <i>P</i> 2 <sub>1</sub> / <i>n</i>                                                             |
| <i>a</i> , Å                                                                                                                                                                                                                                                                                                                       | 12.7016(5)                                                                                     |
| <i>b</i> , Å                                                                                                                                                                                                                                                                                                                       | 20.9067(10)                                                                                    |
| <i>c</i> , Å                                                                                                                                                                                                                                                                                                                       | 20.8591(11)                                                                                    |
| β, °                                                                                                                                                                                                                                                                                                                               | 96.5309(16)                                                                                    |
| <i>V</i> , Å <sup>3</sup>                                                                                                                                                                                                                                                                                                          | 5503.2(4)                                                                                      |
| <i>Z</i>                                                                                                                                                                                                                                                                                                                           | 4                                                                                              |
| λ, Å                                                                                                                                                                                                                                                                                                                               | 0.71073                                                                                        |
| <i>D</i> <sub>calc</sub> , g/cm <sup>3</sup>                                                                                                                                                                                                                                                                                       | 1.552                                                                                          |
| μ, mm <sup>-1</sup>                                                                                                                                                                                                                                                                                                                | 0.829                                                                                          |
| <i>F</i> (000)                                                                                                                                                                                                                                                                                                                     | 2632                                                                                           |
| Crystal size, mm <sup>3</sup>                                                                                                                                                                                                                                                                                                      | 0.169 × 0.151 × 0.137                                                                          |
| Reflections collected                                                                                                                                                                                                                                                                                                              | 44603                                                                                          |
| <i>R</i> <sub>int</sub>                                                                                                                                                                                                                                                                                                            | 0.0234                                                                                         |
| Refinement method                                                                                                                                                                                                                                                                                                                  | Full-matrix least-squares on <i>F</i> <sup>2</sup>                                             |
| Data/restraints/parameters                                                                                                                                                                                                                                                                                                         | 12599/6/759                                                                                    |
| Goodness of fit                                                                                                                                                                                                                                                                                                                    | 1.084                                                                                          |
| Final <i>R</i> indices [ <i>I</i> > 2σ( <i>I</i> )]                                                                                                                                                                                                                                                                                | <i>R</i> 1 = 0.0402, <i>wR</i> 2 = 0.1096                                                      |
| <i>R</i> indices (all data)                                                                                                                                                                                                                                                                                                        | <i>R</i> 1 = 0.0482, <i>wR</i> 2 = 0.1169                                                      |
| * <i>R</i> <sub>1</sub> = Σ    <i>F</i> <sub>0</sub> -   <i>F</i> <sub>c</sub>    / Σ   <i>F</i> <sub>0</sub>  ; * <i>wR</i> <sub>2</sub> = [Σ <i>w</i> ( <i>F</i> <sub>0</sub> <sup>2</sup> - <i>F</i> <sub>c</sub> <sup>2</sup> ) <sup>2</sup> / Σ <i>w</i> ( <i>F</i> <sub>0</sub> <sup>2</sup> ) <sup>2</sup> ] <sup>1/2</sup> |                                                                                                |

**Table S2.** Bond lengths [Å], angles [°], and dihedral angle [°] for **1**.

---

|                        |            |                        |            |
|------------------------|------------|------------------------|------------|
| bond lengths           |            |                        |            |
| Co(1)–O(2)             | 2.0553(17) | Co(2)–O(7)             | 2.0518(16) |
| Co(1)–O(8)             | 2.0697(18) | Co(2)–O(3)             | 2.0733(16) |
| Co(1)–O(6)             | 2.0770(17) | Co(2)–O(1)             | 2.0886(17) |
| Co(1)–O(4)             | 2.0868(17) | Co(2)–N(4)             | 2.1206(19) |
| Co(1)–N(1)             | 2.114(2)   | Co(2)–N(7)             | 2.146(2)   |
| Co(1)–O(1)             | 2.1415(17) |                        |            |
| bond angles            |            |                        |            |
| O(2)–Co(1)–O(8)        | 176.56(7)  | O(3)–Co(2)–O(1)        | 93.07(7)   |
| O(2)–Co(1)–O(6)        | 89.97(7)   | O(7)–Co(2)–N(4)        | 176.11(7)  |
| O(8)–Co(1)–O(6)        | 88.72(8)   | O(1)–Co(2)–N(4)        | 85.40(7)   |
| O(2)–Co(1)–O(4)        | 90.09(7)   | O(7)–Co(2)–N(7)        | 87.22(7)   |
| O(8)–Co(1)–O(4)        | 90.90(8)   | N(4)–Co(2)–N(7)        | 90.54(8)   |
| O(4)–Co(1)–N(1)        | 86.91(8)   | O(1)–Co(2)–O(10)       | 84.71(8)   |
| O(2)–Co(1)–O(1)        | 91.37(7)   | N(4)–Co(2)–O(10)       | 90.13(8)   |
| O(6)–Co(1)–O(1)        | 96.91(7)   | N(7)–Co(2)–O(10)       | 84.53(8)   |
| O(4)–Co(1)–O(1)        | 88.78(7)   | O(7)–Co(2)–O(3)        | 96.13(7)   |
| dihedral angles        |            |                        |            |
| O(2)–Co(1)–O(10)–Co(2) | 50.91      | N(1)–Co(1)–O(1)–Co(2)  | 142.98     |
| O(4)–Co(1)–O(1)–Co(2)  | 140.97     | O(10)–Co(2)–O(1)–Co(1) | 130.07     |
| O(6)–Co(1)–O(1)–Co(2)  | 39.23      | N(4)–Co(2)–O(1)–Co(1)  | 139.37     |
| O(8)–Co(1)–O(1)–Co(2)  | 128.18     | N(7)–Co(2)–O(1)–Co(1)  | 150.98     |

Symmetry transformations used to generate equivalent atoms:

#1  $x + 1/2, -y + 1/2, z + 1/2$ ; #2  $x - 1/2, -y + 1/2, z - 1/2$ ; #3  $x - 1/2, -y + 1/2, z + 1/2$ ; #4  $x, y + 1, z$ ; #5  $x + 1/2, -y + 1/2, z - 1/2$ ; #6  $x, y - 1, z$ .

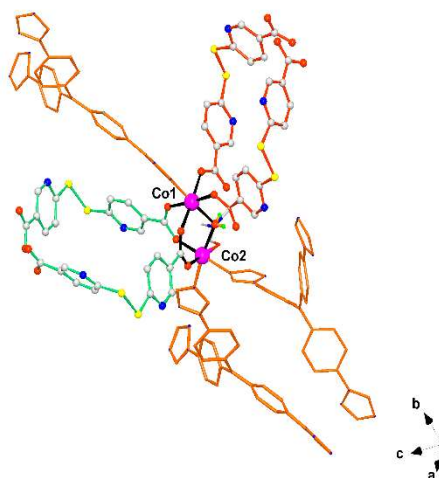

Fig. S1 Coordination environment of **1**.

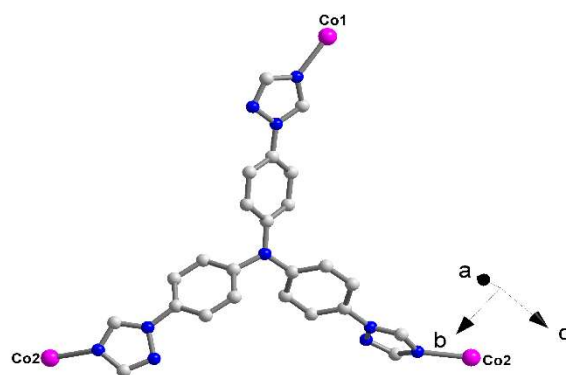

Fig. S2 The coordination mode of the TTPA ligand in compound **1**.

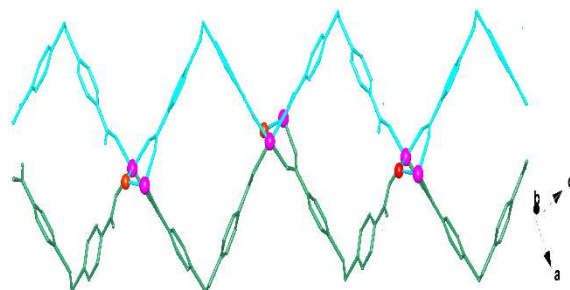

Fig. S3 DTDN<sup>2-</sup> ligands displaying P and M forms.

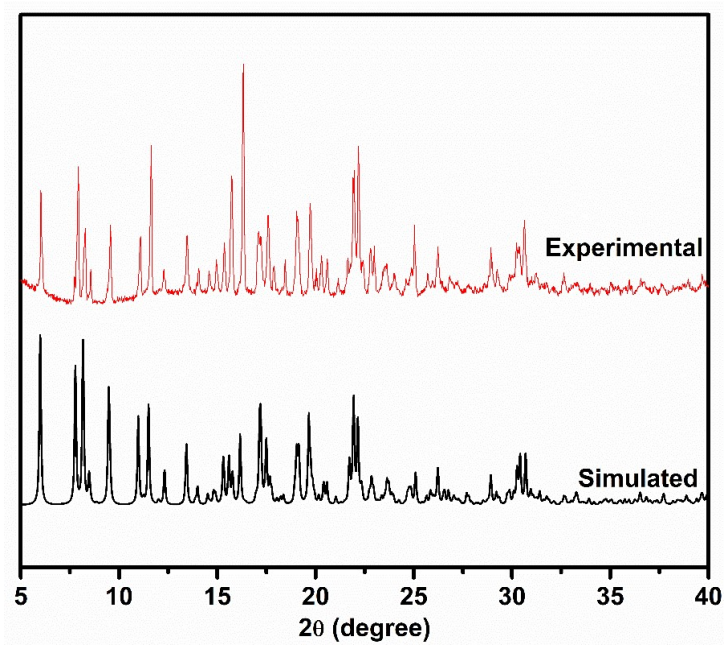

Fig. S4 Simulated and experimental PXRD patterns of **1**.

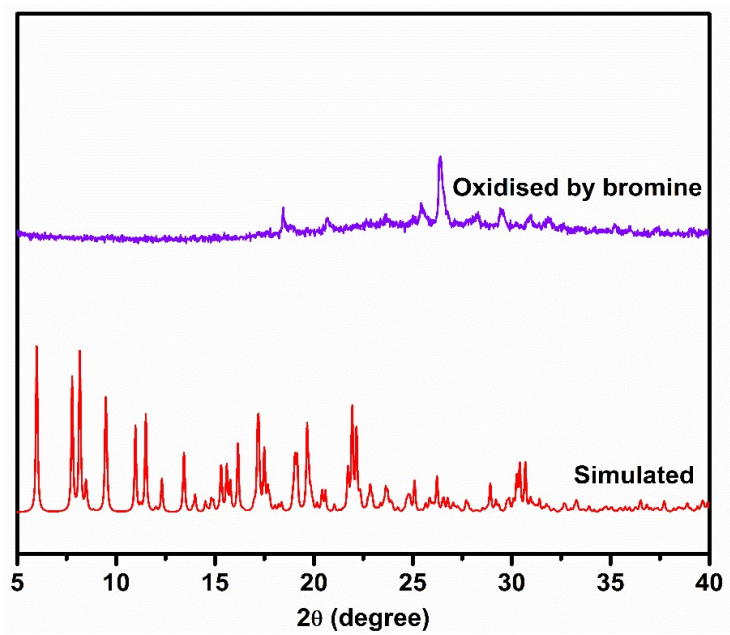

Fig. S5 PXRD pattern of the oxidised sample of **1**.

## Solid–State Spectroelectrochemistry

10 mg of **1** was ground into fine particles, and 2 mL of THF was then added to form a paste. An indium tin oxide (ITO) glass (6 cm x 0.9 cm) was pretreated by washing with ethanol, acetone and purged with nitrogen. The sample was coated on the ITO glass by repeated 4 spin coatings (3100 rpm for 30 s). The coated ITO sample was placed inside a 50 °C oven for 15 min. The spectrum of the coated sample was obtained using a Jasco V-570 UV/vis/NIR spectrometer to confirm that its absorption peaks are identical to those of the original framework. The electrochemical set up employed a three-electrode system, ITO as the working electrode, Pt mesh as the counter electrode and Ag/Ag<sup>+</sup> as the reference electrode in a 0.1 M *n*-Bu<sub>4</sub>NPF<sub>6</sub> propionitrile electrolyte. The above described electrode was placed inside a 1 cm quartz cell, with the coated ITO sample and Pt mesh facing opposite in the cell. To minimize the risk of short-circuits, the compartment was separated by a tailor made Teflon block. A blank ITO with electrolyte was measured as background. The samples were scanned continuously with increments in potential using a Hokuto Denko potentiostat until a change of the spectrum was detected.

## Oxidation of the framework

Bromine oxidation of **1**. Compound **1** was placed inside a small vial. The vial was then placed in a beaker containing 3 to 5 drops of bromine with a watch glass on top. Bromine vapour was allowed to diffuse into the framework for 30 minutes.

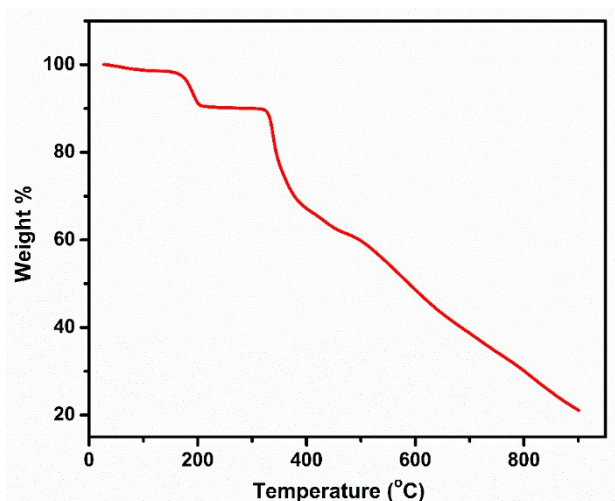

Fig. S6 Thermal gravimetric analysis (TGA) pattern of **1**.

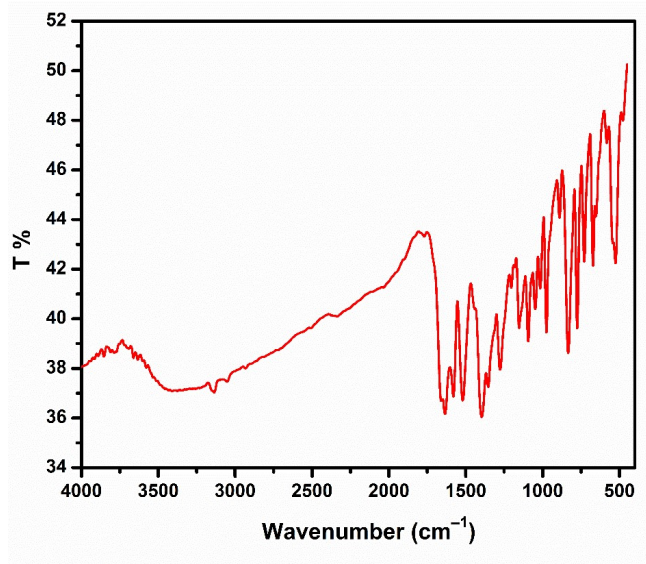

Fig. S7 IR spectrum of **1**.

IR (KBr,  $\text{cm}^{-1}$ ): 3134sh (stretching of triarylamine), 1634s (stretching of carbonyl), 1581s (stretching of aromatic C=C), 1520s (bending of triarylamine), 1274m (stretching of C–O), 832s (bending of aromatic ring).

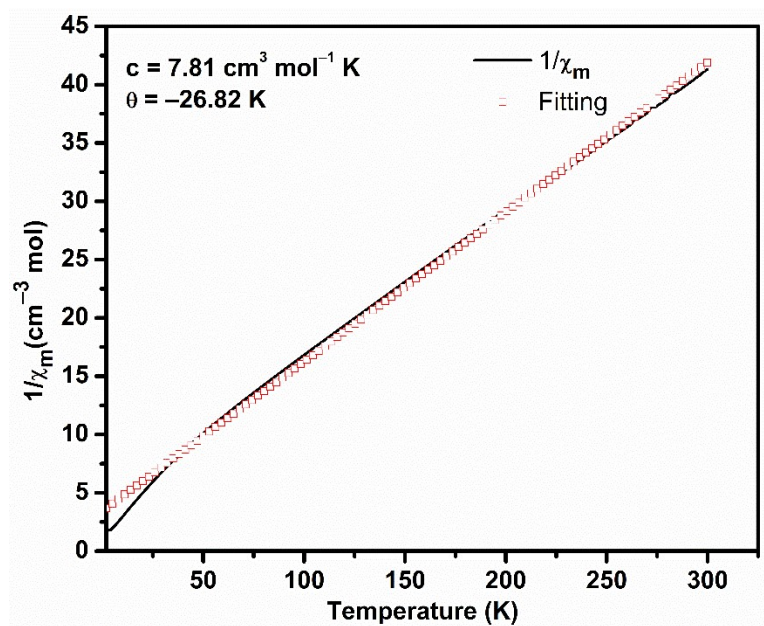

Fig. S8 Plot of  $1/\chi_M$  vs. T for compound **1**.



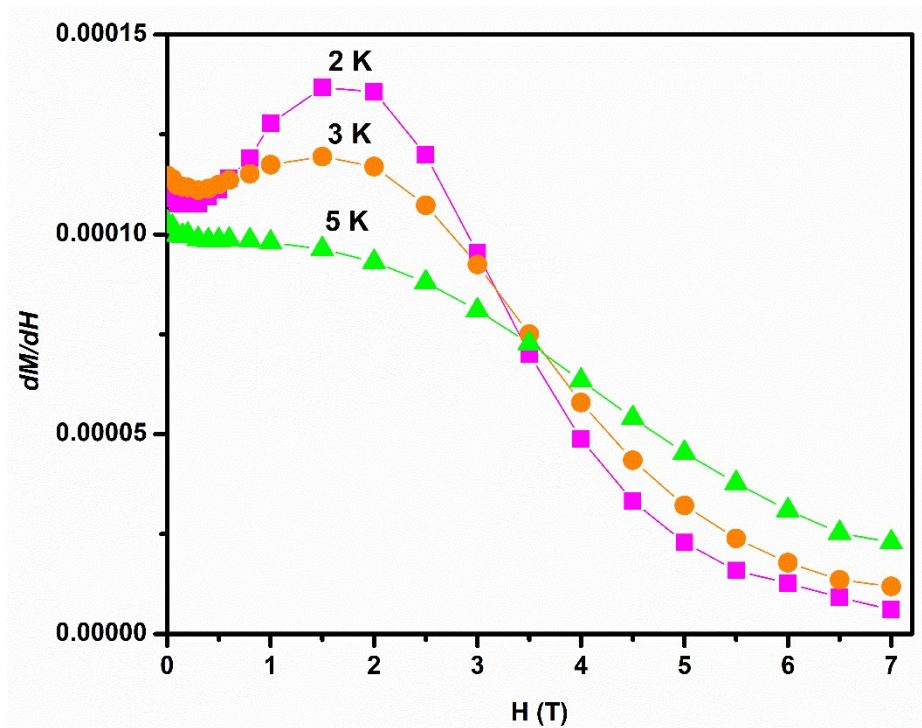

Fig. S9 First derivative plot of  $dM/dH$  for compound 1 at 2, 3, and 5 K.
